# Supplementary material
Source: PubMed Central journal article supplement (PMC4426391)
Supplement: NIHMS687820-supplement-01.pdf [file NIHMS687820-supplement-01.pdf]

## Supplementary Materials for

### Clinical translation of an ultrasmall inorganic optical-PET imaging nanoparticle probe

Evan Phillips, Oula Penate-Medina, Pat B. Zanzonico, Richard D. Carvajal, Pauliah Mohan, Yunpeng Ye, John Humm, Mithat Gönen, Hovanes Kalaigian, Heiko Schöder, H. William Strauss, Steven M. Larson, Ulrich Wiesner, Michelle S. Bradbury\*

\*Corresponding author. E-mail: bradburn@mskcc.org and ubw1@cornell.edu

Published 29 October 2014, *Sci. Transl. Med.* **6**, 260ra149 (2014)

DOI: 10.1126/scitranslmed.3009524

#### The PDF file includes:

##### Materials and Methods

Fig. S1. Whole-body PET-CT imaging biodistributions of  $^{124}\text{I}$ -cRGDY-PEG-C dots with time.

Fig. S2. RadioTLC chromatograms of plasma specimens and standards.

Fig. S3. RadioTLC chromatograms of urinary specimens and standards.

Table S1. Photophysical characterization of cRGDY-PEG-C dots by fluorescence correlation spectroscopy.

Table S2. Post-release product criteria for cRGDY-PEG-C dots.

Table S3. Stability measurements of cRGDY-PEG-C dot batches ( $n = 2$ ) by fluorescence correlation spectroscopy.

Table S4. Individual patient PK results for intravenously injected  $^{124}\text{I}$ -cRGDY-PEG-C dots.

Table S5. Summary of PK results for  $^{124}\text{I}$ -cRGDY-PEG-C dots delivered by systemic injection.

Table S6. Percentage of total body activity of  $^{124}\text{I}$ -labeled nanoparticle or free iodide ( $^{124}\text{I}$ ).

Table S7. Organ- and tissue-specific cumulative  $^{124}\text{I}$  activities by patient.

Table S8. Complete metabolic profile in male subjects.

Table S9. Complete metabolic profile in female subjects.

Table S10. Analysis of urine specimens.

Table S11. Hematologic and nonhematologic adverse events.

References (42–46)

## **Materials and Methods**

### **Synthesis and characterization of cRGDY–PEG–C dots**

The synthesis and characterization of poly(ethylene glycol) (PEG) and cRGDY surface-functionalized fluorescent core-shell silica nanoparticles (cRGDY–PEG–C dots) have been described previously, and the reader is referred to our earlier publication and references therein (16). In brief, particles were prepared by a modified Stöber-type silica condensation (42–44). C dots covalently sequester the organic dye molecule, Cy5 (emission maxima ~650 nm, 2 dye equivalents) in a core encapsulated by a silica shell to markedly enhance brightness and photostability (20, 45) over that observed with the native dye in aqueous solution. Bifunctional PEGs were derivatized with silanes for attachment to the silica surface and maleimides were used for peptide conjugation, respectively. cRGDY peptides (~6 ligands per particle (16)), containing the sequence cyclo-(Arg-Gly-Asp-D-Tyr-Cys) and bearing cysteine residues (Peptide International), were attached to surface-bound functionalized PEG chains via cysteine-maleimide linkages. Hydrodynamic radius, brightness, and concentrations of cRGDY–PEG–C dots, as against free Cy5 dye, were analyzed via a Zeiss LSM 510 Confocor 2 FCS using HeNe 633-nm excitation. These data were obtained in conjunction with absorption and emission spectral profiles for the encapsulated and native Cy5 dye using a Varian Cary 5000 spectrophotometer (Varian) and a fluorescence spectrofluorometer (Photon Technology International, Inc).

### **Radioiodination of cRGDY–PEG–C dots**

Radiolabeling of cRGDY–PEG–C dots was performed by attaching radioiodine ( $^{124}\text{I}$ ,  $^{131}\text{I}$ ) to the tyrosine residues (Y) of peptide moieties using the IODOGEN method (Pierce) (20). The radiolabeled product was eluted from PD-10 columns and assayed using a dose calibrator

(Capintec) and radioTLC. The specific activity, purity, and radiochemical yield of the  $^{124}\text{I}$ -bound particle fractions were measured for each patient run.

### **Radioiodination of peptide ligands**

The cRGDY free peptide, which contains the sequence cyclo-(Arg-Gly-Asp-D-Tyr-Cys), was radioiodinated with  $^{124}\text{I}$  or  $^{131}\text{I}$ , on the tyrosine residue using the IODOGEN method (Pierce) (20). The reaction mixture was transferred onto a PD-10 column and eluted with saline. Fractions were collected and radioassayed with a dose calibrator. Desired fractions were further analyzed by radioTLC, pooled and then concentrated.

### **Pharmacokinetics and metabolic analyses**

For PK analyses, ROIs were drawn on PET imaging data (AW Workstation, GE Healthcare) to extract mean and maximum standard uptake values (SUVs) for all major normal organs and tissues, including brain, lung, left ventricle, liver, spleen, intestine, kidneys, bladder, muscle, breast, and tumor(s). For PK evaluation, SUVs were converted to %ID/g values (i.e.,  $\text{SUV} = \% \text{ID/g tissue} \times \text{patient body mass}/100$ ). Organ/tissue uptake data were supplemented by time-activity data from the blood and urine.

Venous blood and urine specimens were collected at approximately 30 min, 3 h, 24 h, 72 h, and 2 weeks after injection of  $^{124}\text{I}$ -cRGDY-PEG-C dots. Following centrifugation of whole-blood specimens (4000 rpm, 10 min), plasma supernatant, along with urine specimens, were assayed in duplicate in a scintillation well counter (1480 Automatic Gamma Counter, Perkin Elmer, Shelton CT) calibrated for  $^{124}\text{I}$ . RadioTLC analyses were additionally performed on biological specimens. RadioTLC analyses of the particle tracer, native peptide (cRGDY) labeled

with  $^{131}\text{I}$ , and free iodine ( $^{131}\text{I}$ ) served as standards to facilitate interpretation. For all biological samples and standards, a single drop of each radioactive fraction was placed at a starting point of 0.5 inch from the bottom cutoff of a pre-cut silica TLC plate (EMD, 5554-7, 3 inch long  $\times$  1 inch wide). The plates were developed with a mobile phase of acetic acid (1.6 mL) and methanol (0.4 ml), and read by a Bioscan AR-2000 radio-TLC imaging scanner. Activities (cpm) were converted to microCuries ( $\mu\text{Ci}$ ) and decay-corrected. Final values were expressed as %ID/g. Retention factor (Rf) values for the tracer were obtained and used for identification of the parent compound and possible metabolites.

The percentages of the total activity in the form of free iodide and intact particle, were derived from radioTLC results of plasma and urine, body weight-based total plasma volume (5600 ml), and PET-based estimates of total activity in the urinary bladder, respectively. Total activity in the urinary bladder was obtained by analyzing the PET-derived bladder-content activities (the SUV-based %ID/g) and bladder volumes ( $\text{cm}^3$ ) as well as the measured relative peak areas (%) for particle and free iodide on thin-layer chromatograms.

### **PET image acquisition and processing**

Low-dose whole-body spiral CT scans were obtained prior to the acquisition of each whole-body PET scan on a GE Discovery STE PET/CT scanner. Images were recorded at 4, 24, and 72 hours post-injection of the particle tracer. Positron emission data was reconstructed using the ordered subsets expectation maximization (OSEM) algorithm. Images were corrected for attenuation using the CT transmission data. All acquisitions were performed in 2D mode (septa-in) to minimize the contributions from prompt gamma emissions that accompany the positron annihilation in the decay scheme of  $^{124}\text{I}$ . All PET image reconstructions were performed as per

the standard GE ordered subset expectation maximization (OSEM algorithm consisting of 2 iterations and 24 sub-sets with CT attenuation correction. No further image manipulation was performed.

### **Radiation dosimetry**

The radiation dosimetry method used is an adaptation of that promulgated by the MIRD (Medical Internal Radionuclide Dosimetry) Committee, accounting for the physical properties of the administered radionuclides ( $^{124}\text{I}$ ) as well as the biological properties (PK and biodistribution) of the radiopharmaceutical in individual patients. Serial whole-body PET scans enabled derivation of normal-organ absorbed dose (mGy and mGy/MBq) estimates using ROI-derived time-activity data. PET scans were acquired with all parameters identical, including the scan time. Using the patient's total-body mass (in kg) and the 70-kg Standard Man organ masses, the total-body and organ ROI data [mean standard uptake values (SUVs)] were converted to activities (fraction of the injected dose). The foregoing image-derived time-activity data were fit to exponential functions using a least-squares fitting algorithm and the resulting time-activity functions analytically integrated, incorporating the effect of physical decay of  $^{124}\text{I}$  to yield the cumulated activities in  $\mu\text{Ci}\cdot\text{hr}/\mu\text{Ci}$  in the organs and total body. Cumulated activities were used to calculate  $^{124}\text{I}$ -labeled particle mean absorbed doses to the organs (mGy/MBq) and effective dose (mSv/MBq) for the 70-kg Standard Man anatomic model by employing the OLINDA EXM program (Vanderbilt University) (46).

## SUPPLEMENTARY FIGURES

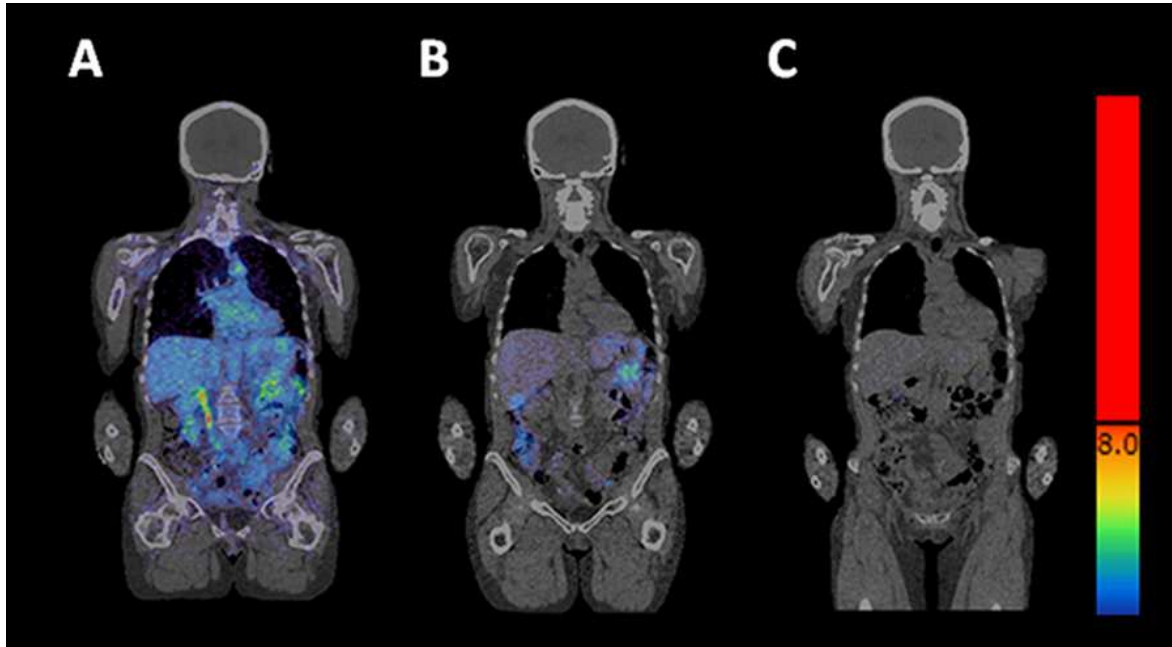

**Fig. S1. Whole-body PET-CT imaging of the biodistributions of  $^{124}\text{I}$ -cRGDY-PEG-C dots with time.** (A to C) PET-CT fusion images for Patient #5, displayed as SUV values, acquired at 2 (A), 24 (B), and 72 (C) hours after i.v. injection of  $^{124}\text{I}$ -cRGDY-PEG-C dots.

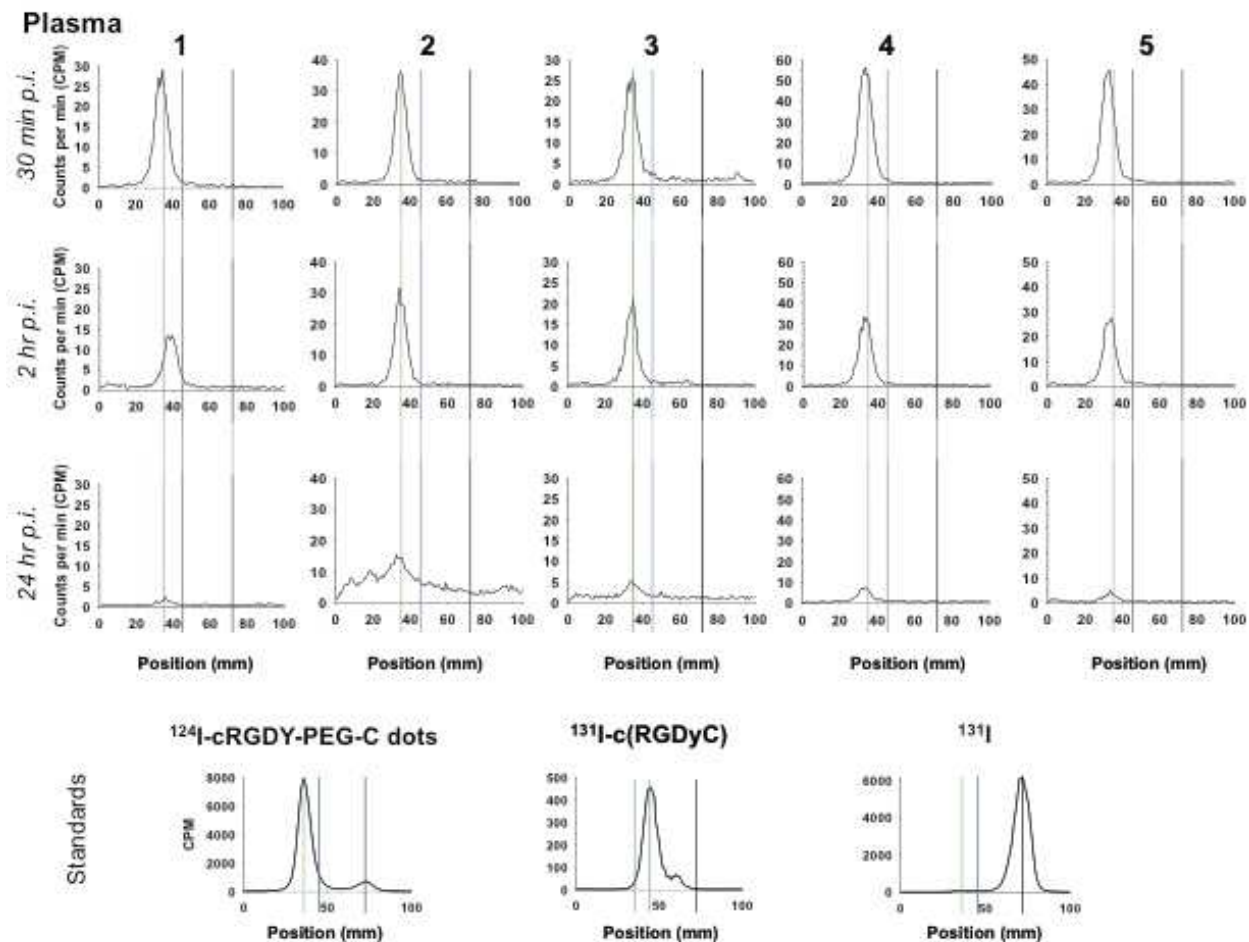

**Fig. S2. RadioTLC chromatograms of plasma specimens and standards.** RadioTLC (4:1 acetic acid:methanol as mobile phase) of plasma specimens (decay-corrected counts per minute, cpm, relative to collection time) for individual patients ( $n = 5$ ). Chromatograms of specimens show a single peak near the origin at 0.5, 2, and 24 hours post-injection (p.i.). Vertical lines discriminate standard peaks corresponding to the particle tracer (long dashes;  $R_f = 0.04$ ),  $^{131}\text{I}$ -cRGDY (short dashes;  $R_f = 0.2$ ), and  $^{131}\text{I}$  (dotted;  $R_f = 0.7$ ).

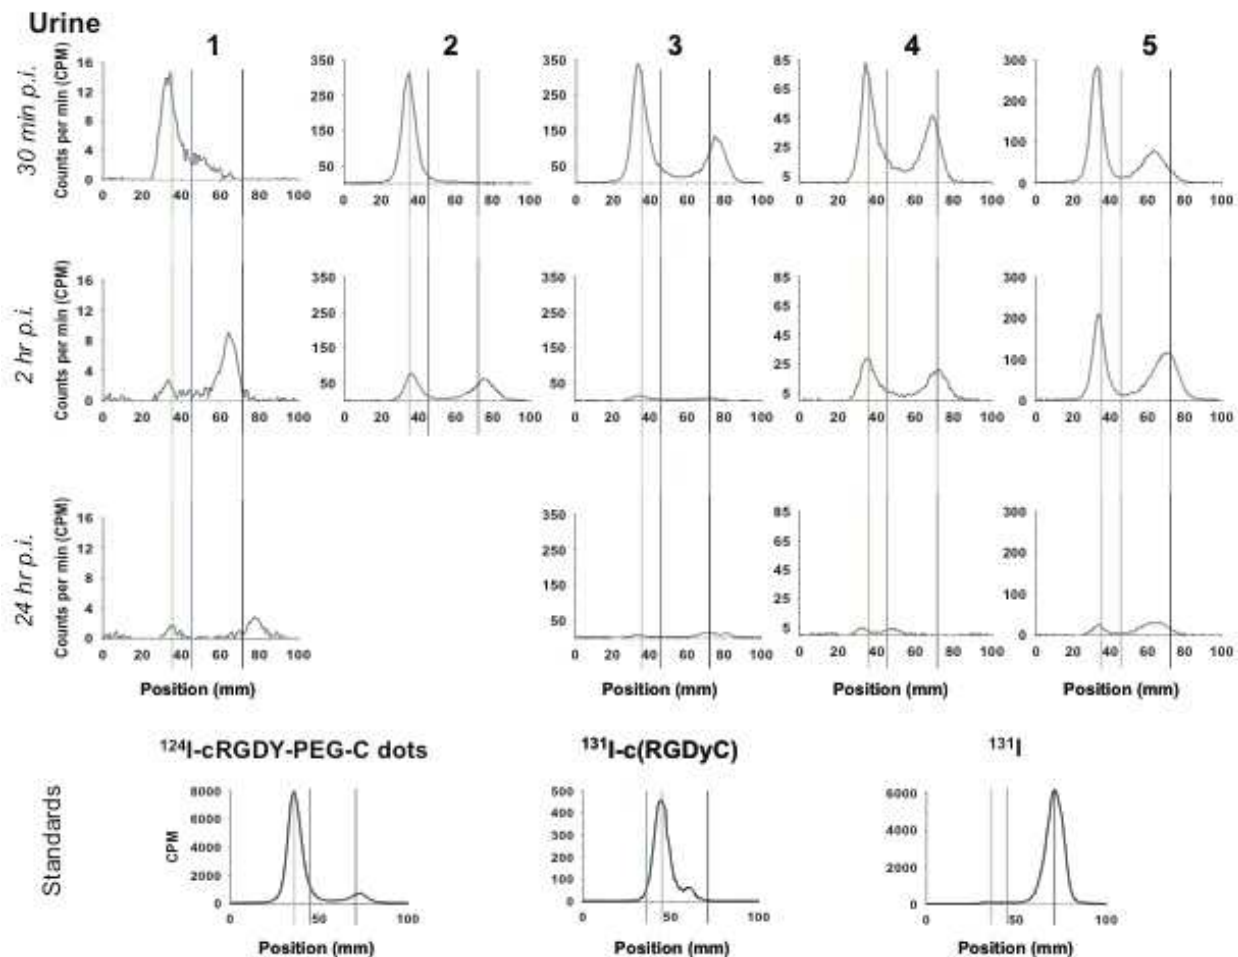

**Fig. S3. RadioTLC chromatograms of urinary specimens and standards.** RadioTLC (4:1 acetic acid:methanol as mobile phase) of urine specimens (background- and decay-corrected counts per minute, cpm, relative to collection time) for individual patients ( $n = 5$ ). Chromatograms of specimens reveal two peaks at 0.5, 2, and 24 hours post-injection (p.i.). Vertical lines discriminate standard peaks corresponding to the particle tracer (long dashes;  $R_f = 0.04$ ),  $^{131}\text{I}$ -c-RGDY (short dashes;  $R_f = 0.2$ ), and  $^{131}\text{I}$  (dotted;  $R_f = 0.7$ ).



**Table S1. Photophysical characterization of cRGDY-PEG-C dots by fluorescence correlation spectroscopy.** The hydrodynamic size, relative brightness, and corresponding concentration of cRGDY-PEG-C dots, along with free Cy5 dye, were measured using fluorescence correlation spectroscopy (FCS). Data are means  $\pm$  SD ( $n = 15$  replicates).

|                         | <b>Hydrodynamic radius (nm)</b> | <b>Brightness/particle (kHz)</b> | <b>Concentration (<math>\mu</math>M)</b> |
|-------------------------|---------------------------------|----------------------------------|------------------------------------------|
| <b>Free Cy5 dye</b>     | $0.83 \pm 0.01$                 | $2.5 \pm 0.04$                   | 0.025                                    |
| <b>cRGDY-PEG-C dots</b> | $2.97 \pm 0.05$                 | $\sim 6.0 \pm 0.09$              | 9.7                                      |

**Table S2. Post-release product criteria for cRGDY-PEG-C dots.** Criteria, as specified by the Investigational Products and Radiochemistry and Molecular Imaging Probes Core Facilities, were approved by the FDA (IND #110375). As appropriate for first-in-human trial of this size, and according to current good manufacturing practices (cGMP) for a phase I clinical trial, the criteria specified are proposed acceptance criteria supported by analytical data from validation studies and clinical trial material. TLC, thin layer chromatography.

| <b>Characteristic</b> | <b>Test</b>                                                            | <b>Specification</b>          |
|-----------------------|------------------------------------------------------------------------|-------------------------------|
| Physicochemical       | pH                                                                     | 6.0–8.0                       |
| Purity                | Radiochemical purity (TLC)                                             | No less than 90%              |
| Purity                | Test for free iodine (TLC)                                             | No greater than 10%           |
| Radionuclide identity | Half-life test (gamma spectrum analyzer, on incoming <sup>124</sup> I) | Conforms to expected spectrum |
| Specific activity     | TLC, absorbance, and dose calibrator                                   | 27.8–57.4 GBq/μmol            |

**Table S3. Stability measurements of cRGDY-PEG-C dot batches ( $n = 2$ ) by fluorescence correlation spectroscopy.** To assess long-term particle stability, FCS analyses of two particle batches in water were conducted at approximately 1 month and 1–2 years following particle synthesis. Hydrodynamic size and the number of dye equivalents (equiv) per particle, a measure of the relative brightness, were monitored. The results of these batches were used to assess the expected shelf life of these particles for clinical trial studies. Data are means  $\pm$  SD ( $n = 15$  replicates).

| Batch # | Time post-synthesis<br>(~1 month) |                       | Time post-synthesis<br>(~1–2 yrs) |                    |
|---------|-----------------------------------|-----------------------|-----------------------------------|--------------------|
|         | Radius<br>(nm)                    | Dye<br>equiv/particle | Radius (nm)                       | Dye equiv/particle |
| 1       | 3.40 $\pm$ 0.07                   | 2.91                  | 3.36 $\pm$ 0.06<br>(~2 yrs)       | 2.50<br>(~2 yrs)   |
| 2       | 3.21 $\pm$ 0.05                   | 2.24                  | 3.36 $\pm$ 0.07<br>(~1 yr)        | 2.32<br>(~1 yr)    |

**Table S4. Individual patient PK results for intravenously injected <sup>124</sup>I-cRGDY-PEG-C dots.**

| Patient ID              | %ID/g( $\times 10^{-3}$ ) |      |      |       |       |       |       |       |      |       |      |      |       |      |      |
|-------------------------|---------------------------|------|------|-------|-------|-------|-------|-------|------|-------|------|------|-------|------|------|
|                         | #1                        |      |      | #2    |       |       | #3    |       |      | #4    |      |      | #5    |      |      |
| Time post-injection (h) | 3                         | 24   | 72   | 3     | 24    | 72    | 3     | 24    | 72   | 3     | 24   | 72   | 3     | 24   | 72   |
| Brain                   | 0.44                      | 0.3  | 0.06 | 0.6   | 0.34  | 0.15  | 0.71  | 0.29  | 0.05 | 1.16  | 0.43 | 0.18 | 0.49  | 0.14 | 0.07 |
| Parotid                 | 4.14                      | 3.87 | 0.14 | 6.15  | 4.76  | 5.06  | 2.23  | 1.14  | 0.03 | 4.29  | 3.72 | 1.78 | 17    | 4.68 | 1.16 |
| Heart                   | 5.26                      | 0.94 | 0.2  | 6.1   | 1.91  | 0.49  | 4.54  | 1.06  | 0.13 | 5.51  | 2.22 | 0.47 | 7.58  | 1.18 | 0.23 |
| Lung                    | 2.5                       | 0.46 | 0.07 | 1.94  | 0.65  | 0.25  | 2.1   | 0.33  | 0.06 | 1.45  | 0.57 | 0.18 | 1.75  | 0.53 | 0.79 |
| Thyroid                 | 0                         | 0    | 0    | 20.28 | 42.79 | 25.28 | 7.64  | 2.99  | 2.86 | 3.08  | 3.25 | 3.99 | 3.44  | 0.75 | 0.11 |
| Liver                   | 3.59                      | 1.06 | 0.94 | 5.31  | 2.24  | 1.28  | 3.81  | 1.68  | 0.66 | 5     | 3.55 | 1.34 | 7.33  | 2.23 | 1.95 |
| Spleen                  | 3.21                      | 1.26 | 0.2  | 3.82  | 1.94  | 1.06  | 3.19  | 1.06  | 0.43 | 3.22  | 1.65 | 0.72 | 4.6   | 1.84 | 2.86 |
| GI                      | 8.36                      | 4.14 | 0.11 | 16.18 | 2.94  | 2.15  | 3.05  | 0.89  | 0.3  | 1.16  | 1.96 | 0.97 | 3.51  | 0.63 | 0.23 |
| Kidney                  | 3.14                      | 2.39 | 0.41 | 7.46  | 4.29  | 3.09  | 3.96  | 3.21  | 1.56 | 5.71  | 5.54 | 3.74 | 33.65 | 5.4  | 3.11 |
| Spine                   | 1.8                       | 1.03 | 0.17 | 1.82  | 0.81  | 0.32  | 2.78  | 0.56  | 0.11 | 2.32  | 1.73 | 0.41 | 1.42  | 0.56 | 0.37 |
| Bladder                 | 14.54                     | 12.9 | 0.66 | 42.38 | 29.82 | 4.01  | 17.7  | 31.49 | 0.88 | 21.88 | 9.16 | 0.67 | 82.46 | 9.7  | 2.26 |
| Muscle                  | 1.43                      | 0.43 | 0.07 | 1.71  | 0.37  | 0.28  | 0.96  | 0.23  | 0.05 | 1.24  | 0.61 | 0.21 | 1.75  | 0.47 | 0.23 |
| Plasma                  | 6.2                       | 0.75 | 0.1  | 8.7   | 2.1   | 0.5   | 7.79  | 1.27  | 0.13 | 8.98  | 2.27 | 0.63 | 9.14  | 1.27 | 0.16 |
| Urine                   | 7.7                       | 5.42 | 0.25 | 64.1  | 29.1  | 6.3   | 15.16 | 14.21 | 0.34 | 25.32 | 9.65 | 5.38 | 86.5  | 19.5 | 2.26 |

**Table S5. Summary of PK results for  $^{124}\text{I}$ -cRGDY-PEG-C dots delivered by systemic injection. (A and B) %ID/g values for tissues (A) and for biological specimens (B). Data are median values and interquartile ranges ( $n = 5$ ).**

**A**

| Tissue<br>Time<br>post-injection (h) | %ID/g( $\times 10^{-3}$ ) |                   |                  |
|--------------------------------------|---------------------------|-------------------|------------------|
|                                      | 4                         | 24                | 72               |
| Lungs                                | 1.94 (1.75-2.10)          | 0.53 (0.46-0.57)  | 0.18 (0.07-0.25) |
| Heart                                | 5.51 (5.26-6.10)          | 1.18 (1.06-1.91)  | 0.23 (0.20-0.47) |
| Liver                                | 5.00 (3.8-5.31)           | 2.23 (1.68-2.24)  | 1.28 (0.94-1.34) |
| Spleen                               | 3.22 (3.21-3.82)          | 1.65 (1.26-1.84)  | 0.72 (0.43-1.06) |
| GI                                   | 3.51 (3.05-8.36)          | 1.96 (0.89-2.94)  | 0.30 (0.23-0.97) |
| Kidneys                              | 5.71(3.96-7.46)           | 4.29 (3.21-5.40)  | 3.09 (1.56-3.11) |
| Bladder                              | 21.90 (17.7-42.38)        | 12.90 (9.7-29.82) | 0.88 (0.67-2.26) |
| Muscle                               | 1.43 (1.24-1.71)          | 0.43 (0.37-0.47)  | 0.21 (0.07-0.23) |
| Parotid                              | 4.29 (4.14-6.15)          | 3.87 (3.72-4.68)  | 1.16 (0.14-1.78) |
| Thyroid                              | 3.44 (3.08-7.64)          | 2.99 (0.75-3.25)  | 2.86 (0.11-3.99) |
| Brain                                | 0.60 (0.49-0.71)          | 0.30 (0.29-0.34)  | 0.07 (0.06-0.15) |
| Spine                                | 1.82 (1.80-2.32)          | 0.81 (0.56-1.03)  | 0.32 (0.17-0.37) |

**B**

| Specimen<br>Time<br>post-injection (h) | %ID/g( $\times 10^{-3}$ ) |                    |                    |                   |
|----------------------------------------|---------------------------|--------------------|--------------------|-------------------|
|                                        | 0.5                       | 4                  | 24                 | 72                |
| Blood                                  | 13.9 (13.5-14.1)          | 8.7 (7.79-8.98)    | 1.27 (1.27-2.1)    | 0.16 (0.134-0.50) |
| Urine                                  | 96.8 (45.2-109.0)         | 25.3 (15.20-64.10) | 14.20 (9.65-19.50) | 2.26 (0.34-5.38)  |

**Table S6. Percentage of total body activity of  $^{124}\text{I}$ -labeled nanoparticle or free iodide ( $^{124}\text{I}$ ).** Data are based on the estimated plasma, urine, and total body extracellular fluid compartment activities as well as the radioTLC analyses of plasma and urine at 0.5 and 24 hours post-injection of  $\sim 5$  mCi  $^{131}\text{I}$ -cRGDY-PEG-C dot. Data are the percentage of the total activity representing free iodide relative to that in the form of intact particle from a representative patient.

**Percentage (%) of total activity**

| <b>Time post-injection (h)</b> | <b>Particle</b> | <b>Iodide</b> |
|--------------------------------|-----------------|---------------|
| 0.5                            | 99              | 1             |
| 24                             | 97.5            | 2.5           |

**Table S7. Organ- and tissue-specific cumulated  $^{124}\text{I}$  activities by patient.** Data are medians  $\pm$  SD ( $n = 5$ ). The cumulative tracer activities in the GI tract, heart, and bladder were counted intact; contents were not emptied prior to performing measurements.

| Patient ID    | Cumulative activity ( $\mu\text{Ci-h/mCi}$ ) |       |      |       |      | Median | SD   |
|---------------|----------------------------------------------|-------|------|-------|------|--------|------|
|               | 1                                            | 2     | 3    | 4     | 5    |        |      |
| GI            | 1.28                                         | 3.05  | 0.62 | 0.98  | 0.45 | 0.98   | 1.04 |
| Kidneys       | 0.17                                         | 0.45  | 0.37 | 0.86  | 0.66 | 0.45   | 0.27 |
| Bone (marrow) | 2.97                                         | 3.01  | 3.49 | 3.09  | 2.51 | 3.01   | 0.35 |
| Brain         | 0.07                                         | 0.13  | 0.09 | 0.16  | 0.08 | 0.09   | 0.04 |
| Lungs         | 0.12                                         | 0.14  | 0.13 | 0.17  | 0.18 | 0.14   | 0.03 |
| Heart         | 0.17                                         | 0.28  | 0.28 | 0.33  | 0.20 | 0.28   | 0.06 |
| Liver         | 0.78                                         | 1.29  | 0.80 | 1.60  | 1.38 | 1.29   | 0.37 |
| Bladder       | 0.49                                         | 1.55  | 1.89 | 0.60  | 1.08 | 1.08   | 0.60 |
| Muscle        | 5.73                                         | 10.50 | 6.50 | 12.20 | 6.98 | 6.98   | 2.81 |
| Spleen        | 0.07                                         | 0.12  | 0.09 | 0.13  | 0.06 | 0.09   | 0.03 |
| Thyroid       | 0.00                                         | 0.19  | 0.09 | 0.10  | 0.00 | 0.09   | 0.08 |

**Table S8. Complete metabolic profile in male subjects.** The datum in each cell represents a single measurement collected at a given time post-injection. Specimens were collected at 5 time points. ALP, alkaline phosphatase; ALT, alanine aminotransferase; AST, aspartate aminotransferase; Base, baseline; BUN, blood urea nitrogen; Hb, hemoglobin; LDH, lactate dehydrogenase; NR, normal range; RBC, red blood cells; WBC, white blood cells.

|                   | Time post-injection (h) | #1   |      |      |      |      |      | #3   |      |      |      |      |      | #4   |      |      |      |      |              | Male NR                           |
|-------------------|-------------------------|------|------|------|------|------|------|------|------|------|------|------|------|------|------|------|------|------|--------------|-----------------------------------|
|                   |                         | Base | 0.5  | 2    | 24   | 72   | 2 wk | Base | 0.5  | 2    | 24   | 72   | 2 wk | Base | 0.5  | 2    | 24   | 72   | 2 wk         |                                   |
| Metabolic profile | Na                      | 139  | 137  | 138  | 137  | 139  | 135  | 140  | 137  | 139  | 140  | 141  | 135  | 138  | 138  | 138  | 138  | 141  | 140          | [136-144 mEq/l]                   |
|                   | K                       | 4.2  | 4.1  | 4.6  | 3.9  | 4.6  | 4.3  | 4.1  | 4.6  | H    | 4.3  | 4.2  | 4.4  | 4.2  | 4.4  | 3.9  | 4.3  | 4.5  | 4.3          | [3.5-5.1 mEq/l]                   |
|                   | Cl                      | 103  | 101  | 101  | 101  | 105  | 103  | 105  | 103  | 104  | 106  | 108  | 103  | 105  | 103  | 102  | 103  | 106  | 106          | [98-109 mEq/l]                    |
|                   | CO <sub>2</sub>         | 29   | 31   | 32   | 32   | 31   | 24   | 27   | 26   | 28   | 28   | 26   | 25   | 26   | 27   | 29   | 32   | 29   | 29           | [24-30 mEq/l]                     |
|                   | Calcium                 | 10   | 8.6  | 8.9  | 9.3  | 9.3  | 10.3 | 10.3 | 9.2  | 9.6  | 9.5  | 9.3  | 9.8  | 9.2  | 8.7  | 8.9  | 9.2  | 8.8  | 9.1          | [8.5-10.5 mg/dl]                  |
|                   | Glucose                 | 98   | 77   | 79   | 77   | 83   | 136  | 141  | 76   | 77   | 82   | 84   | 118  | 123  | 95   | 82   | 67   | 78   | 142          | [70-99; <140 (non-fasting) mg/dl] |
| Renal             | BUN                     | 11   | 21   | 18   | 20   | 16   | 14   | 8    | 9    | 8    | 9    | 10   | 8    | 37   | 38   | 38   | 35   | 32   | 31           | [6-20 mg/dl]                      |
|                   | Creatinine              | 0.9  | 0.9  | 0.8  | 0.8  | 0.9  | 0.9  | 1.1  | 1    | 1    | 1.1  | 1    | 0.9  | 1.7  | 1.5  | 1.5  | 1.5  | 1.5  | 1.7          | [0.6-1.3 mg/dl]                   |
| Hepatic function  | Total bilirubin         | 0.6  | 0.2  | 0.3  | 0.3  | 0.3  | 0.6  | 1.1  | 0.9  | H    | 1    | 0.8  | 0.7  | 0.8  | 0.6  | 0.6  | 0.4  | 0.3  | 0.7          | [0-1.0 mg/dl]                     |
|                   | Total protein           | 6.8  | 6.1  | 6.2  | 6.7  | 6.8  | 7.0  | 6.6  | 6.9  | 7.6  | 7.4  | 7.4  | 6.5  | 6    | 6.5  | 6.6  | 6.4  | 6.2  | 6.3          | [6.3-8.1 g/dl]                    |
|                   | Albumin                 | 3.8  | 3.9  | 3.9  | 4.2  | 4.3  | 4.2  | 4.2  | 4.5  | 5    | 4.8  | 4.8  | 4.3  | 3.9  | 4.2  | 4.4  | 4.2  | 4.1  | 4            | [4.0-5.2 g/dl]                    |
|                   | ALP*                    | 77   | 89   | 98   | 100  | 105  | 88   | 75   | 67   | 61   | 74   | 73   | 59   | 50   | 52   | 58   | 60   | 58   | 66           | [33-97 U/l]                       |
|                   | AST                     | 24   | 29   | 27   | 20   | 22   | 28   | 45   | 29   | 37   | 32   | 35   | 21   | 24   | 40   | 42   | 36   | 36   | 22           | [10-37 U/l]                       |
|                   | ALT                     | 21   | 21   | 24   | 23   | 28   | 18   | 57   | 41   | 46   | 44   | 42   | 23   | 18   | 35   | 36   | 36   | 36   | 21           | [5-37 U/l]                        |
| LDH               | 237                     | --   | --   | --   | --   | 191  | 204  | --   | --   | --   | --   | 185  | 204  | --   | --   | --   | --   | 224  | [12-246 U/l] |                                   |
| Blood counts      | WBC                     | 5.4  | 15.6 | 14.2 | 6.6  | 5.3  | 7.4  | 5.7  | 6.4  | 8    | 6.9  | 6.7  | 5.4  | 2.7  | 3.6  | 3.5  | 3.6  | 3.6  | 3.3          | [4-11 K/mcl]                      |
|                   | RBC                     | 3.96 | 3.37 | 3.50 | 3.65 | 3.70 | 3.96 | 4.81 | 4.7  | 5.2  | 5.18 | 4.93 | 5.28 | 3.02 | 3.04 | 3.00 | 2.97 | 2.94 | 3.02         | [4.2-5.6 M/mcl]                   |
|                   | Hb                      | 10.3 | 9.3  | 10.1 | 10.1 | 10.2 | 11.1 | 12.9 | 13   | 13.9 | 13.7 | 13.9 | 14.1 | 10.1 | 10.1 | 10.2 | 9.6  | 9.7  | 10.2         | [13-17 g/dl]                      |
|                   | Hematocrit              | 32.9 | 29.1 | 29.8 | 30.7 | 31.5 | 34.1 | 39   | 38.8 | 43.4 | 43.1 | 41.2 | 43.3 | 28.2 | 28.6 | 28.3 | 28   | 28.1 | 28.5         | [38-52 %]                         |
|                   | Platelets               | 303  | 191  | 186  | 182  | 186  | 282  | 315  | 301  | 347  | 369  | 313  | 355  | 155  | 128  | 133  | 130  | 131  | 140          | [160-400 K/mcl]                   |

\*For patients older than age 55 (Patient #4), the ALP range changed to 45–129 U/l.
